# Supplementary material
Source: PubMed Central journal article supplement (PMC6467052)
Supplement: NIHMS1011406-supplement-SI.pdf [file NIHMS1011406-supplement-SI.pdf]

**Supporting Information**

**How Ligand Protonation State Controls Water  
in Protein-Ligand Binding**

Jack A. Henderson, Robert C. Harris, Cheng-Chieh Tsai, and Jana Shen\*

*Department of Pharmaceutical Sciences, University of Maryland School of Pharmacy,  
Baltimore, MD 21201.*

E-mail: [jana.shen@rx.umaryland.edu](mailto:jana.shen@rx.umaryland.edu)

**Supplementary Figures**

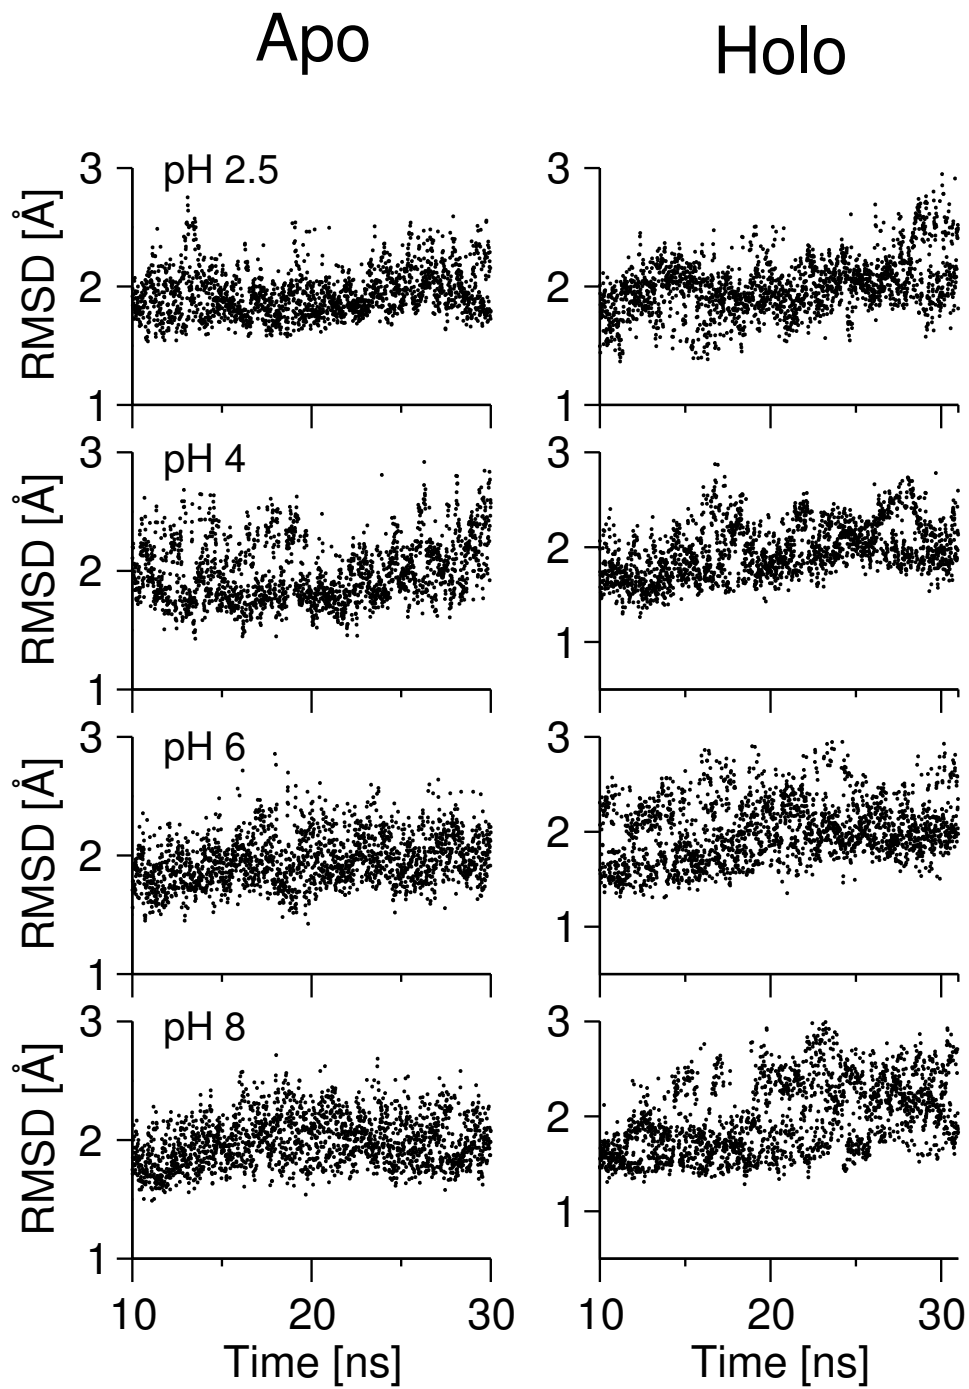

Figure 1: Time series of the backbone root-mean-square deviation (RMSD) from the crystal structure in the simulations of the apo and holo BACE2 at pH 2.5, 4, 6, and 8.

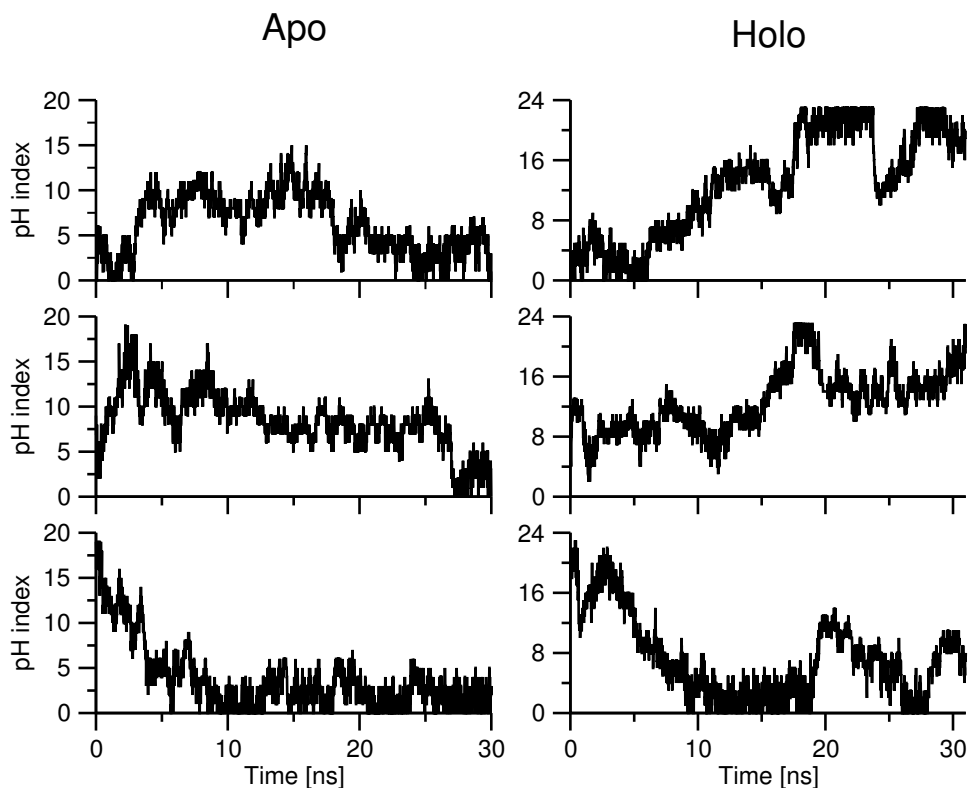

Figure 2: Time series of the replica walks through the pH ladders in the apo and holo simulations. Three randomly chosen replicas are shown. For the apo simulation, a pH index in the range of 1–20 corresponds to a pH condition in the range of 1.3–8. For the holo simulation, a pH index in the range of 1–24 corresponds to a pH condition in the range of -1–8. See Methods section in the main text for the pH conditions.

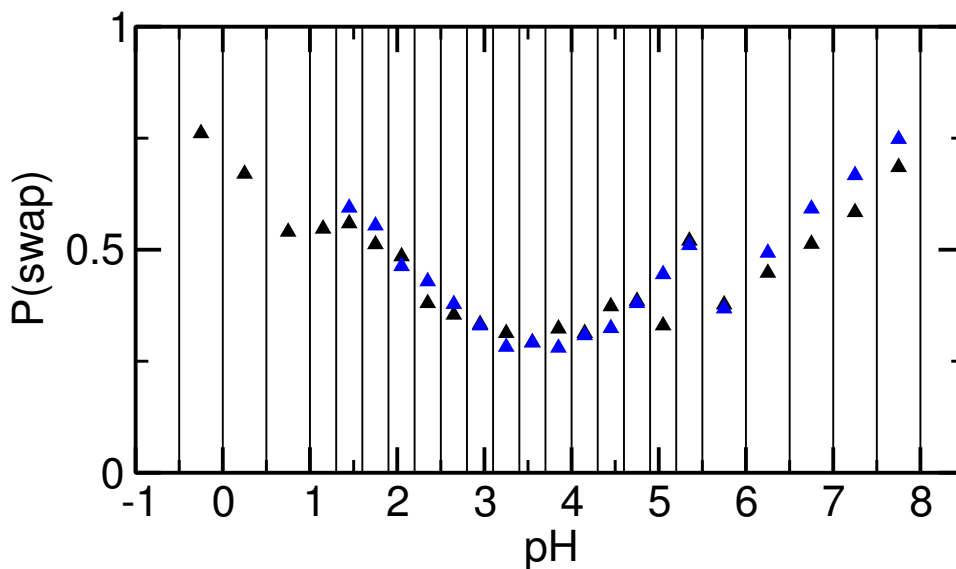

Figure 3: Average acceptance ratios of replica-exchange walks in the apo and holo BACE2 simulations.

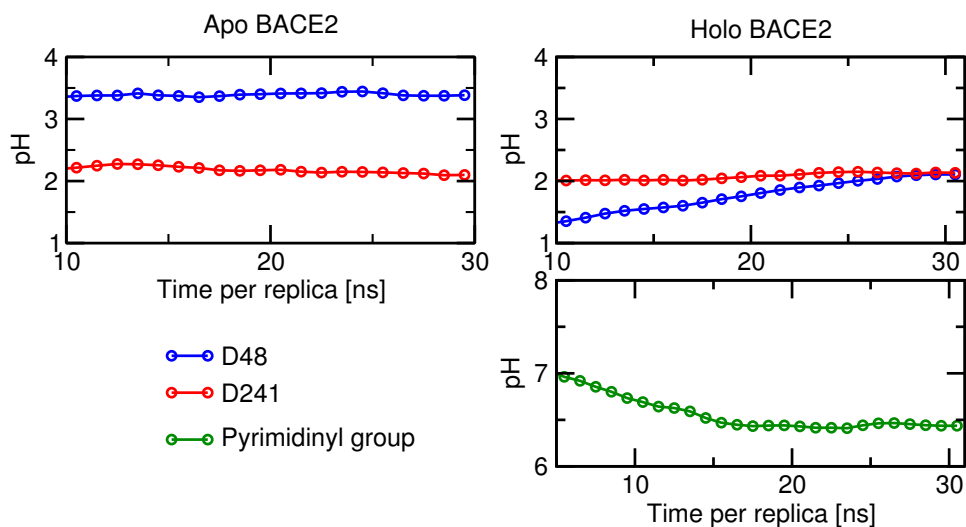

Figure 4: Time series of the cumulatively calculated  $pK_a$ 's of the catalytic dyad and inhibitor.  $pK_a$  calculation was performed every 1 ns.

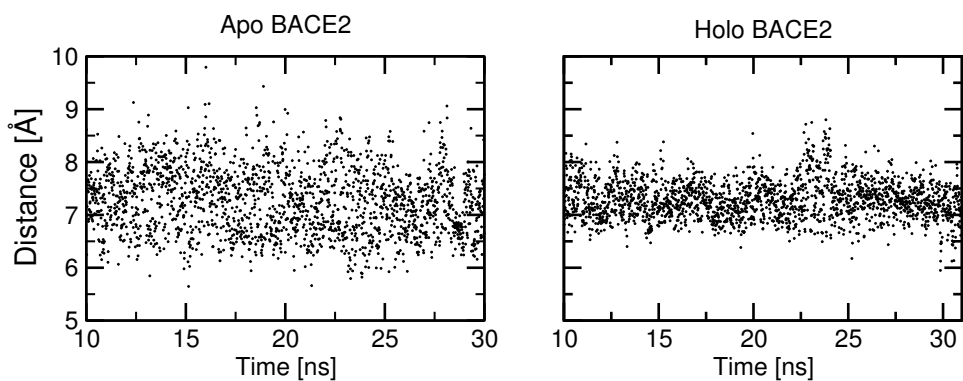

Figure 5: Time series of the S3 pocket width in the simulations of apo and holo BACE2 at pH 6. The data was used to plot the distributions shown in Figure 4c.
